# Supplementary figures and images for: Neural dynamics underlying self-control in the primate subthalamic nucleus
Source: eLife journal article supplement (doi:10.7554/elife.83971), 2023-05-19

**A**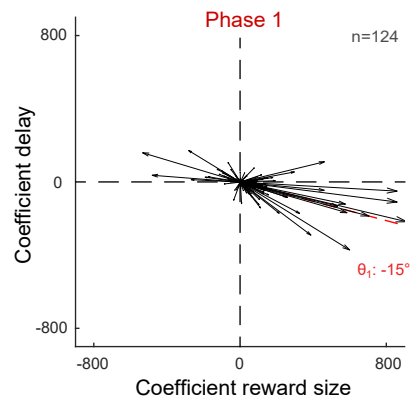**B**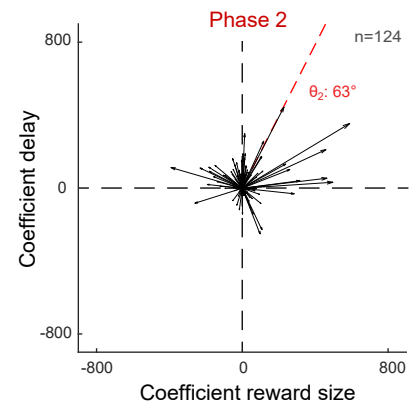

Supplement: supp [file elife-83971-supp-v1.zip]

Monkey H  
n= 112

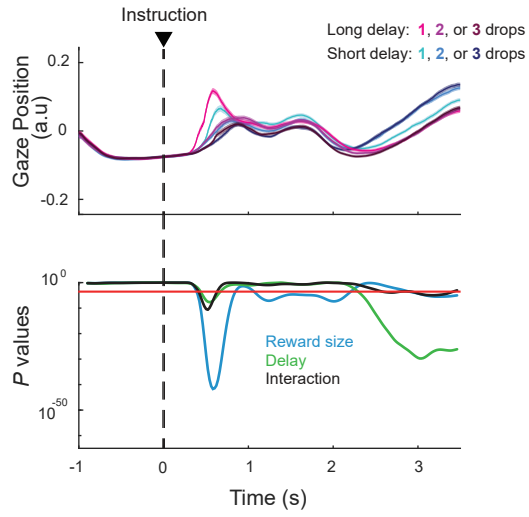

Monkey C  
n= 119

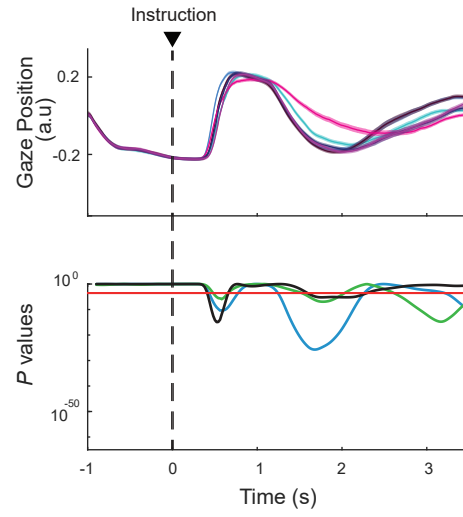

Supplement: supp [file elife-83971-supp-v1.zip]

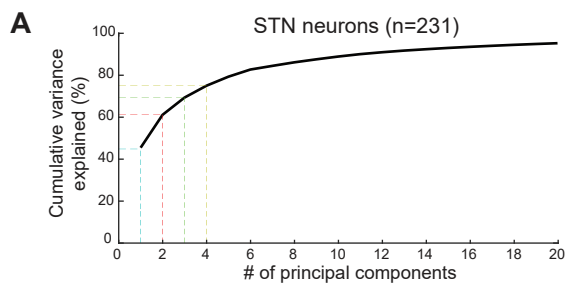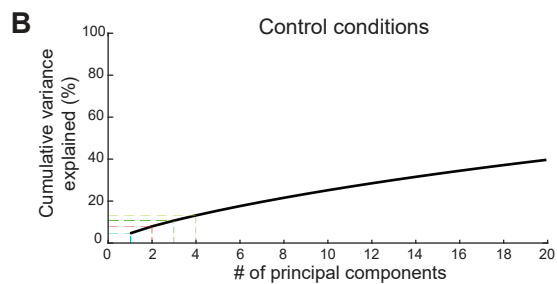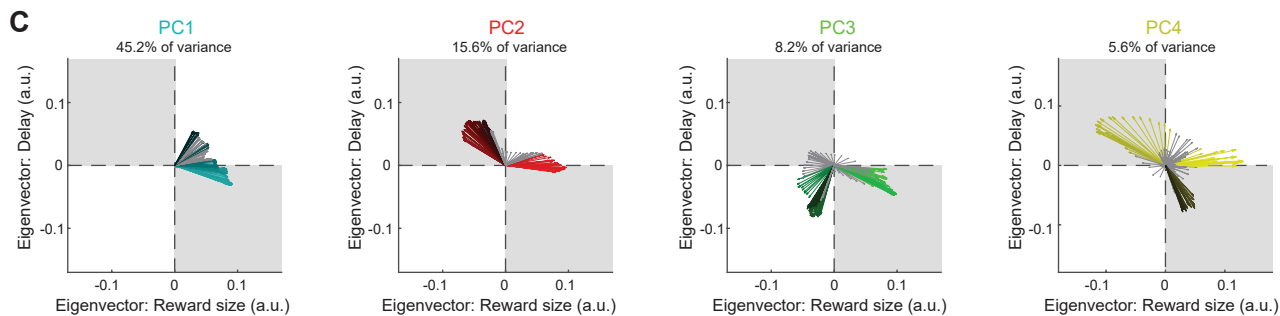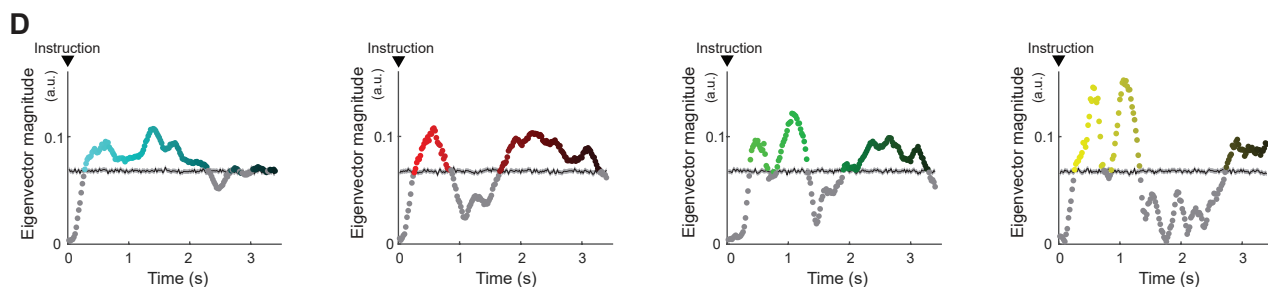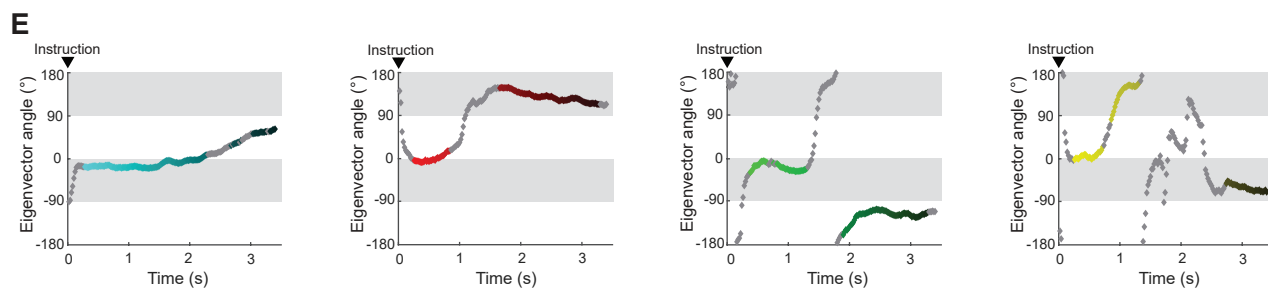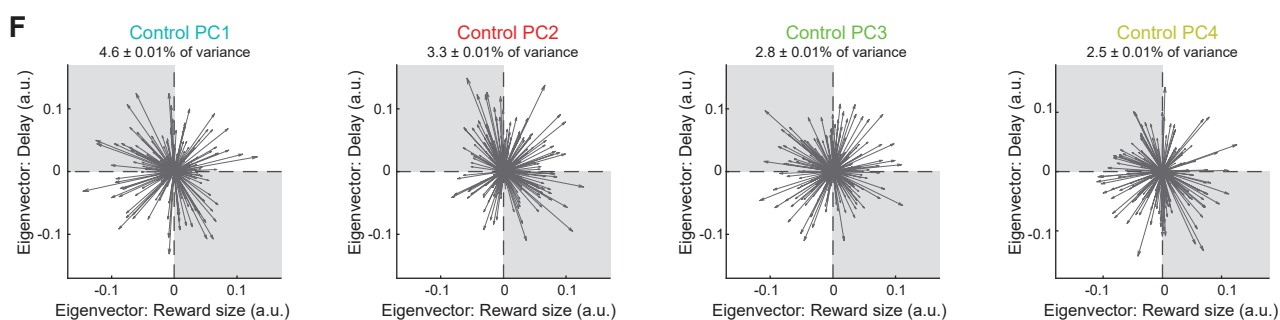

Supplement: supp [file elife-83971-supp-v1.zip]
